# Supplementary material for: Extracellular pH-manipulated in situ reconfiguration of aptamer functionalized DNA monomer enables specifically improved affinity, detection and drug delivery
Source: Royal Society of Chemistry journal article supplement (doi:10.1039/d0an00101e), 2020-01-01
Supplement: d0an00101e1.pdf [file d0an00101e1.pdf]

## Electronic Supplementary Information (ESI)

### **Extracellular pH-Manipulated In Situ Reconfiguration of Aptamer Functionalized DNA Monomer Enable Specifically Improved Affinity, Detection and Drug Delivery**

*Shanzi Zou, Yanli Lei,\* Wenjie Ma, Biao Chen, Hong Cheng, Ruichen Jia, Zenghui Li, Xiaoxiao He,\* and Kemin Wang\**

State Key Laboratory of Chemo/Biosensing and Chemometrics, College of Biology, College of Chemistry and Chemical Engineering, Hunan University, Key Laboratory for Bio-Nanotechnology and Molecule Engineering of Hunan Province, Changsha 410082, China.

\* E-mail: [xiaoxiaohe@hnu.edu.cn](mailto:xiaoxiaohe@hnu.edu.cn); [kmwang@hnu.edu.cn](mailto:kmwang@hnu.edu.cn); [leiyanni222@126.com](mailto:leiyanni222@126.com).

Tel/Fax: +86-731-88821566.

## Content list

|                                                                                       |     |
|---------------------------------------------------------------------------------------|-----|
| 1. Sequences of oligonucleotides used in this study.                                  | S-3 |
| 2. Dynamic light scattering analysis of AptDM and MDA.                                | S-4 |
| 3. CD spectra of AptDM.                                                               | S-5 |
| 4. Flow cytometric assays of the behavior of control probes.                          | S-6 |
| 5. Binding ability of ZY11, AptDM and MDA after incubation without Mg <sup>2+</sup> . | S-7 |
| 6. Quantitative detection of SMMC-7721 cells by MDA.                                  | S-8 |
| 7. Dox loading capacity of AptDM.                                                     | S-9 |

**Table S1** All of the oligonucleotides used in this work.<sup>1</sup>

| Probe                          | Sequence (5'-3')                                                                                                                       |
|--------------------------------|----------------------------------------------------------------------------------------------------------------------------------------|
| Y <sub>1i</sub>                | CGA CCG ATG AAT AGC <i>T</i> ATC CGT ACC TAC TCG <b>TTTTT CCC<br/>CCC T CCC CCC</b>                                                    |
| Y <sub>2i</sub>                | CGA GTC GTT CGC ACG <i>T</i> GCT ATT CAT CGG TCG <b>TTTTT CCC<br/>CCC T CCC CCC</b>                                                    |
| Y <sub>3</sub>                 | CGA GTA GGT ACG GAT <i>T</i> CGT GCG AAC GAC TCG GCT GTG<br>AAC CAA GTC                                                                |
| Cy5-apt                        | Cy5- <i>T</i> GAC TTG GTT CAC AGC <i>TTT TTTT TTT</i> <u>ACG CGC GCG<br/>CGC ATA GCG CGC TGA GCT GAA GAT CGT ACC GTG AGC<br/>GCG T</u> |
| Cy5-con <sup>2</sup>           | Cy5- <i>T</i> GAC TTG GTT CAC AGC <i>TTT TTTT TTT</i> ACT CAT AGT GTG<br>TTT CAC ACT ATT TTA TCT TTG TTC TTA TCT TAT GAG T             |
| Y <sub>1c</sub> <sup>3</sup>   | CGA CCG ATG AAT AGC <i>T</i> ATC CGT ACC TAC TCG <b>TTTTT TTT<br/>TTT T TTT TTT</b>                                                    |
| Y <sub>2c</sub> <sup>3</sup>   | CGA GTC GTT CGC ACG <i>T</i> GCT ATT CAT CGG TCG <b>TTTTT TTT<br/>TTT T TTT TTT</b>                                                    |
| Y <sub>1cp</sub> <sup>4</sup>  | CGA CCG ATG AAT AGC TAT CCG TAC CTA CTC GTA <b>GTC<br/>GAA TGT CTC GTT A</b>                                                           |
| Y <sub>2cp</sub> <sup>4</sup>  | CGA GTC GTT CGC ACG TGC TAT TCA TCG GTC GTA <b>GTC GAA<br/>TGT CTC GTT A</b>                                                           |
| Y <sub>1cp'</sub> <sup>4</sup> | CGA CCG ATG AAT AGC TAT CCG TAC CTA CTC GTT <b>AAC<br/>GAG ACA TTC GAC T</b>                                                           |
| Y <sub>2cp'</sub> <sup>4</sup> | CGA GTC GTT CGC ACG TGC TAT TCA TCG GTC GTT <b>AAC GAG<br/>ACA TTC GAC T</b>                                                           |

<sup>1</sup> In all sequences, split i-motif DNA sequences are in bold. The complementary ssDNA sequences used to replace split i-motif sequences are shown in blue. ZY11 sequence against SMMC-7721 cell is showed underlined, poly T in italic is used as linker for minimizing steric resistance.

<sup>2</sup> ConDM is assembled from Cy5-con, Y<sub>1i</sub>, Y<sub>2i</sub>, Y<sub>3</sub>, which shows little affinity to target SMMC-7721 cells. <sup>3</sup> AptDM<sub>Con</sub> is assembled from Cy5-apt, Y<sub>1c</sub>, Y<sub>2c</sub>, and Y<sub>3</sub>, which is incapable of crosslinking each other into bulk nanostructure in whatever pH. While, ConDM<sub>Con</sub> is assembled from Cy5-con, Y<sub>1c</sub>, Y<sub>2c</sub>, Y<sub>3</sub>, which is neither affinitive to target cells nor sensitive to pH.

<sup>4</sup> AptDM-C<sub>1</sub> is assembled from Cy5-apt, Y<sub>1cp</sub>, Y<sub>2cp</sub> and Y<sub>3</sub>, while AptDM-C<sub>2</sub> is assembled from Cy5-apt, Y<sub>1cp'</sub>, Y<sub>2cp'</sub>, and Y<sub>3</sub>. AptDM-C<sub>1</sub> and AptDM-C<sub>2</sub> can spontaneously crosslink each other into bulk nanostructure (MDA<sub>cp</sub>) via sticky-end hybridization in whatever pH.

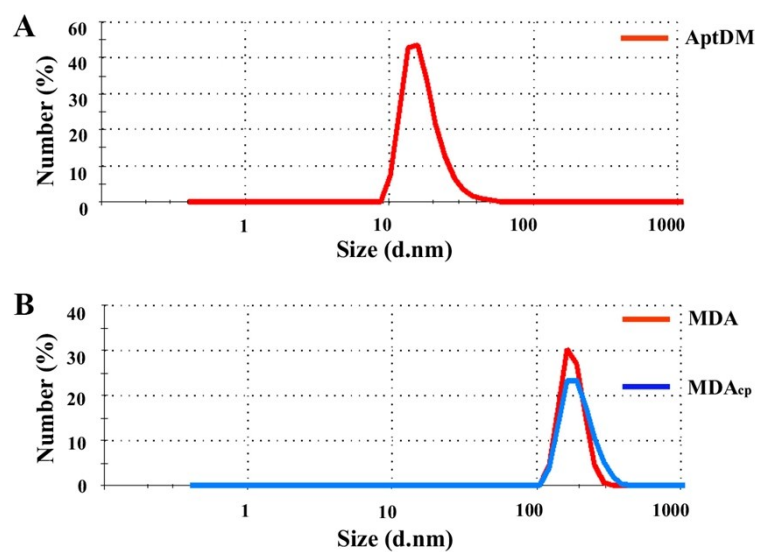

**Fig. S1** Dynamic light scattering analysis of the size of AptDM, MDA and MDA<sub>cp</sub>, showing the mean diameters at 17.1, 178.5 and 195.2 nm, respectively.

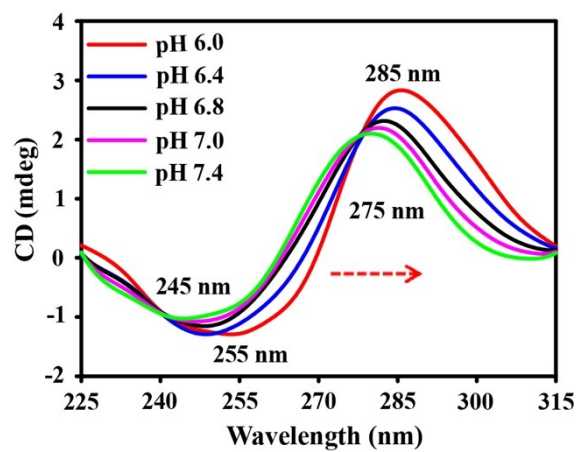

**Fig. S2** CD spectra of AptDM in PBS with different pH values. (Probe concentration: 1  $\mu$ M.)

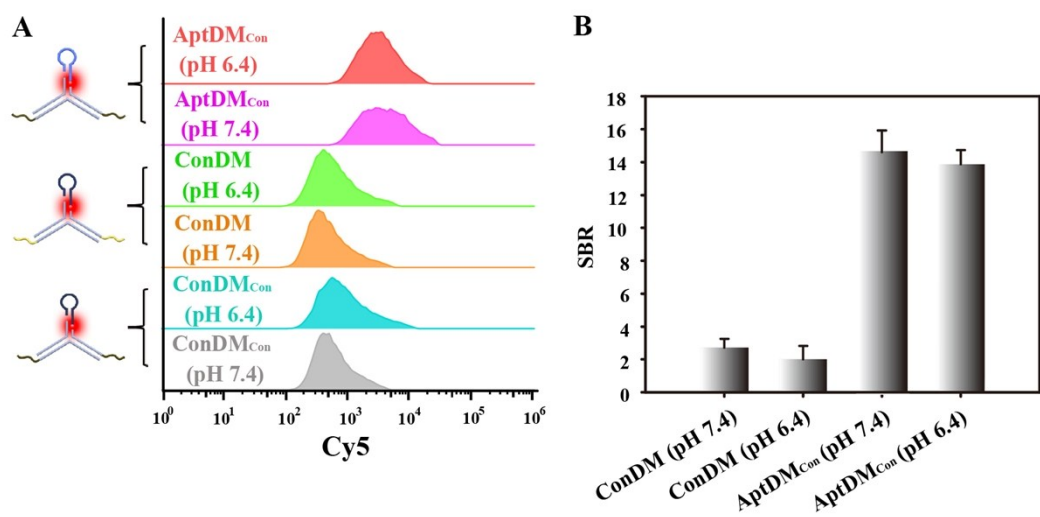

**Fig. S3** (A) Flow cytometric assays of SMMC-7721 cells after incubation with different probes in binding buffer with different pH values, respectively. (B) The corresponding signal-to-background ratio (SBR) of probes in (A) for detecting SMMC-7721 cells at different pH values. (Probe concentration: 50 nM.)

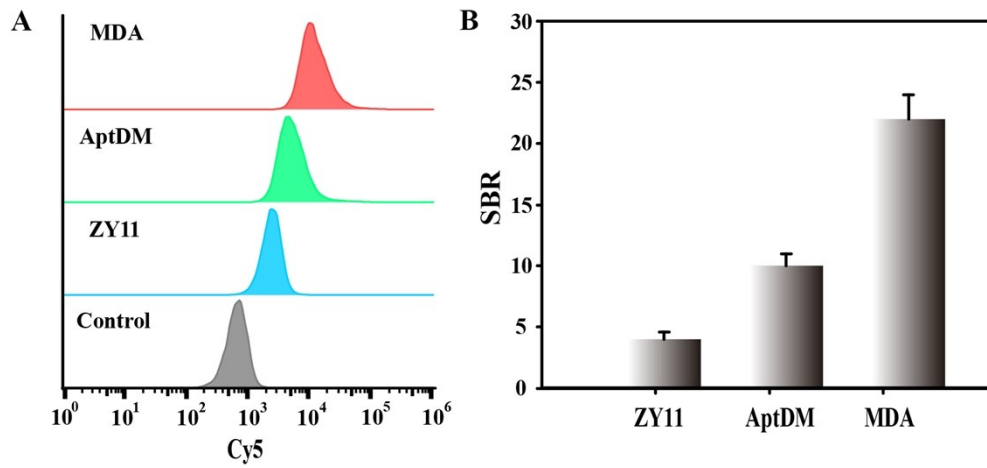

**Fig. S4** (A) Flow cytometric assay of binding ability of different probes to SMMC-7721 cells at 37 °C in binding buffer containing 0 mM  $Mg^{2+}$ . (B) The corresponding SBR of ZY11, AptDM and MDA probes in (A).

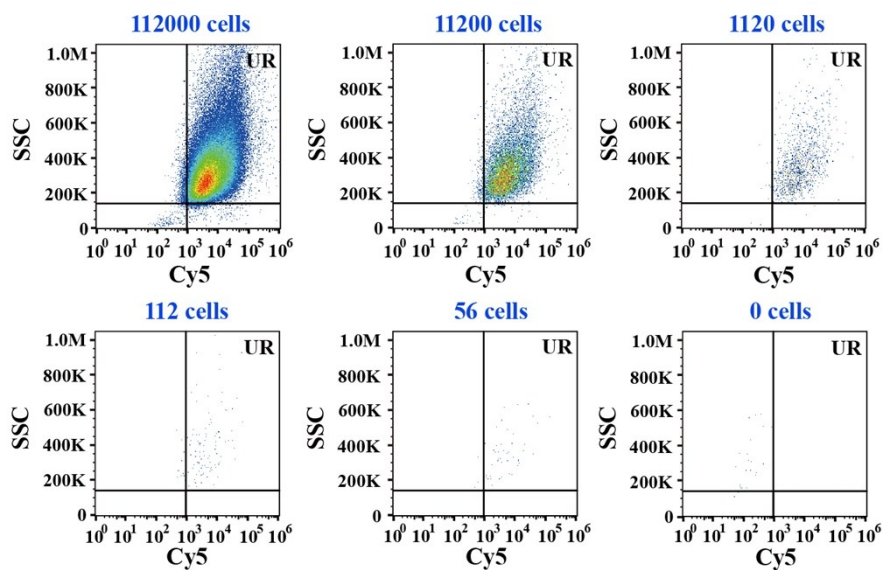

**Fig. S5** Flow cytometric assays of SMMC-7721 cells with decreasing cell number from  $1.12 \times 10^5$  to 0 in 150  $\mu$ L binding buffer after incubation with MDA.



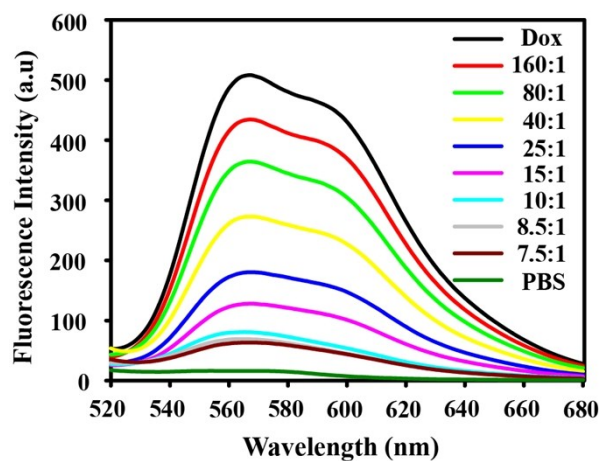

**Fig. S6** Fluorescence spectra of Dox solutions (1  $\mu$ M) added with AptDM at various ratios of Dox to AptDM.
